# Supplementary material
Source: ML conference proceedings conference paper supplement (https://proceedings.neurips.cc/paper_files/paper/2014/hash/5751ec3e9a4feab575962e78e006250d-Abstract.html)
Supplement: Supplementary file [file 5751ec3e9a4feab575962e78e006250d-Supplemental.zip]

---

**Algorithm 2**  $M(\alpha, D)$ 

---

**input** Privacy parameter  $\alpha > 0$ , database  $D \in \mathcal{X}^n$ .

**output** Max estimate  $m \in \mathbb{R}$ .

- 1: Draw  $Z \sim \text{Lap}(1/\alpha)$ .
  - 2: **return**  $f^{(1)}(D) + Z/n$ .
- 

---

**Algorithm 3**  $S(\alpha, m, \theta_1, \theta_2, \dots, \theta_{K-1}, D)$ 

---

**input** Privacy parameter  $\alpha > 0$ , max estimate  $m \in \mathbb{R}$ , thresholds  $\theta_1, \theta_2, \dots, \theta_{K-1} \in \mathbb{R}$ , database  $D \in \mathcal{X}^n$ .

**output** Rank  $r \in \{1, 2, \dots, K\}$ .

- 1: Draw  $G \sim \text{Lap}(2/\alpha)$  and  $Z_1, Z_2, \dots, Z_{K-1} \stackrel{\text{iid}}{\sim} \text{Lap}(4/\alpha)$
  - 2: **for**  $r = 1, 2, \dots, K-1$  **do**
  - 3:   **if**  $m - f^{(r+1)}(D) > (Z_r + G)/n + \theta_r$  **then**
  - 4:     **return**  $r$ .
  - 5:   **end if**
  - 6: **end for**
  - 7: **return**  $K$ .
- 

## A Appendix

### A.1 Privacy Analysis

In this section, we present the proof of Theorem 2. We rely on composition results for approximate differential privacy to analyze the three parts of Algorithm 1:

- Differential privacy of releasing  $m$  after Step 3.
- Differential privacy of releasing  $\ell$  after Step 12.
- Approximate differential privacy of releasing  $I$  after Step 15.

We make this explicit by encapsulating these parts in Algorithm 2 (M), Algorithm 3 (S), and Algorithm 4 (A), so we can write Algorithm 1 as follows (after the definitions of  $T^{(r)}$  and  $t^{(r)}$ ):

1.  $m := M(\alpha/3, D)$ .
2.  $\ell := S(\alpha/3, m, T^{(1)}, T^{(2)}, \dots, T^{(K-1)}, D)$ .
3.  $I := A(\alpha/3, \ell, D)$ .

#### A.1.1 max Estimation

The first part of Algorithm 1 is a standard application of the Laplace mechanism; it is detailed in Algorithm 2.

**Lemma 1** ([17]).  $M(\alpha, \cdot)$  is  $\alpha$ -differentially private.

**Lemma 2.** With probability at least  $1 - \delta$ ,

$$M(\alpha, D) \leq f^{(1)}(D) + \frac{1}{n\alpha} \ln \frac{1}{2\delta}.$$

*Proof.* This follows from the tail properties of the Laplace distribution. □

#### A.1.2 Certifying the Margin Condition

The second part of Algorithm 1 is an application of the “sparse vector technique” to certify the margin condition; it is detailed in Algorithm 3.

**Lemma 3.** For any  $m, \theta_1, \theta_2, \dots, \theta_{K-1} \in \mathbb{R}$ ,  $S(\alpha, m, \theta_1, \theta_2, \dots, \theta_{K-1}, \cdot)$  is  $\alpha$ -differentially private.

*Proof.* This is an application of the sparse vector technique from [22] that halts as soon as the first “query” is answered positively. We give the privacy analysis for completeness. For clarity, we suppress the dependence of  $S$  on all inputs except  $D$ , and define  $F^{(r+1)} := m - f^{(r+1)} - \theta_r$ , which inherits the  $(1/n)$ -Lipschitz property from  $f^{(r+1)}$ .

Pick any neighboring datasets  $D$  and  $D'$ , and pick any  $\ell \in \{1, 2, \dots, K\}$ . We use the notation  $\Pr_{|G}(\cdot)$  for conditional probabilities where the value of  $G$  is fixed, so  $\Pr(\cdot) = \mathbb{E}(\Pr_{|G}(\cdot))$ , where the expectation is taken with respect to  $G$ . Observe that

$$\Pr_{|G}(S(D) = \ell) = \Pr_{|G}(S(D) \leq \ell | S(D) > \ell - 1) \prod_{r=1}^{\ell-1} \Pr_{|G}(S(D) > r | S(D) > r - 1). \quad (3)$$

From the definition of  $S$  and  $F^{(r+1)}$ ,

$$\Pr_{|G}(S(D) > r | S(D) > r - 1) = \Pr_{|G}\left(F^{(r+1)}(D) \leq \frac{Z_r + G}{n}\right) \quad \forall r \in \{1, 2, \dots, \ell - 1\},$$

and

$$\Pr_{|G}(S(D) \leq \ell | S(D) > \ell - 1) = \Pr_{|G}\left(F^{(\ell+1)}(D) > \frac{Z_\ell + G}{n}\right).$$

Write  $\mathbf{Z}_{1:\ell-1} := (Z_1, Z_2, \dots, Z_{\ell-1})$ , and define for any  $g \in \mathbb{R}$ ,

$$\mathcal{Z}_g(D) := \left\{ \mathbf{z} \in \mathbb{R}^{\ell-1} : F^{(r+1)}(D) \leq \frac{z_r + g}{n} \quad \forall r \in \{1, 2, \dots, \ell - 1\} \right\},$$

so that

$$\begin{aligned} \prod_{r=1}^{\ell-1} \Pr_{|G}(S(D) > r | S(D) > r - 1) &= \prod_{r=1}^{\ell-1} \Pr_{|G}\left(F^{(r+1)}(D) \leq \frac{Z_r + G}{n}\right) \\ &= \Pr_{|G}(\mathbf{Z}_{1:\ell-1} \in \mathcal{Z}_G(D)). \end{aligned}$$

Hence, substituting into (3), we have

$$\Pr_{|G}(S(D) = \ell) = \Pr_{|G}\left(F^{(\ell+1)}(D) > \frac{Z_\ell + G}{n}\right) \Pr_{|G}(\mathbf{Z}_{1:\ell-1} \in \mathcal{Z}_G(D)).$$

Letting  $p$  denote the density of  $G$ , we have the following chain of inequalities:

$$\begin{aligned} \Pr(S(D) = \ell) &= \mathbb{E}(\Pr_{|G}(S(D) = \ell)) \\ &= \int_{-\infty}^{\infty} \Pr_{|G}\left(F^{(\ell+1)}(D) > \frac{Z_\ell + g}{n}\right) \Pr_{|G}(\mathbf{Z}_{1:\ell-1} \in \mathcal{Z}_g(D)) p(g) dg \\ &\leq \exp(\alpha/2) \int_{-\infty}^{\infty} \Pr_{|G}\left(F^{(\ell+1)}(D) > \frac{Z_\ell + g}{n}\right) \Pr_{|G}(\mathbf{Z}_{1:\ell-1} \in \mathcal{Z}_g(D)) p(g+1) dg \quad (4) \end{aligned}$$

$$\begin{aligned} &= \exp(\alpha/2) \int_{-\infty}^{\infty} \Pr_{|G}\left(F^{(\ell+1)}(D) > \frac{Z_\ell + g - 1}{n}\right) \Pr_{|G}(\mathbf{Z}_{1:\ell-1} \in \mathcal{Z}_{g-1}(D)) p(g) dg \\ &\leq \exp(\alpha/2) \int_{-\infty}^{\infty} \Pr_{|G}\left(F^{(\ell+1)}(D) > \frac{Z_\ell + g - 1}{n}\right) \Pr_{|G}(\mathbf{Z}_{1:\ell-1} \in \mathcal{Z}_g(D')) p(g) dg \quad (5) \end{aligned}$$

$$\begin{aligned} &\leq \exp(\alpha) \int_{-\infty}^{\infty} \Pr_{|G}\left(F^{(\ell+1)}(D') > \frac{Z_\ell + g}{n}\right) \Pr_{|G}(\mathbf{Z}_{1:\ell-1} \in \mathcal{Z}_g(D')) p(g) dg \quad (6) \\ &= \exp(\alpha) \Pr(S(D') = \ell). \end{aligned}$$

To prove (4), we use the fact  $p(g) \leq \exp(\alpha/2)p(g+1)$  since  $p$  is the Laplace density with scale parameter  $\alpha/2$ . To prove (5), observe that for all  $r \in \{1, 2, \dots, \ell - 1\}$ , the  $(1/n)$ -Lipschitz property of  $F^{(r+1)}$  implies

$$F^{(r+1)}(D) \leq \frac{Z_r + g - 1}{n} \implies F^{(r+1)}(D') \leq \frac{Z_r + g}{n}.$$

---

**Algorithm 4**  $A(\alpha, \ell, D)$ 

---

**input** Privacy parameter  $\alpha > 0$ , number of items  $\ell > 0$ , database  $D \in \mathcal{X}^n$ .

**output** Item  $I \in \mathcal{U}$ .

- 1: Let  $\mathcal{U}_\ell$  be the set of  $\ell$  items in  $\mathcal{U}$  with highest  $f(i, D)$  value, ties broken arbitrarily.
  - 2: Draw  $I \sim \mathbf{p}$  where  $p_i \propto 1\{i \in \mathcal{U}_\ell\} \exp(n\alpha f(i, D)/2)$ .
  - 3: **return**  $I$ .
- 

This, in turn, implies  $\mathcal{Z}_{g-1}(D) \subseteq \mathcal{Z}_g(D')$ , so (5) follows. To prove (6), we use the following. Observe that

$$F^{(\ell+1)}(D) > \frac{Z_\ell + g - 1}{n} \implies F^{(\ell+1)}(D') > \frac{Z_\ell + g - 2}{n}$$

by the  $(1/n)$ -Lipschitz property of  $F^{(\ell+1)}$ . Therefore

$$\begin{aligned} \Pr_{|G} \left( F^{(\ell+1)}(D) > \frac{Z_\ell + g - 1}{n} \right) &\leq \Pr_{|G} \left( F^{(\ell+1)}(D') > \frac{Z_\ell + g - 2}{n} \right) \\ &\leq \exp(\alpha/2) \Pr_{|G} \left( F^{(\ell+1)}(D') > \frac{Z_\ell + g}{n} \right) \end{aligned}$$

where we use the fact that  $Z_\ell \sim \text{Lap}(\alpha/4)$  for the last step, so (6) follows.  $\square$

**Lemma 4.** *With probability at least  $1 - \delta$ , if  $\mathcal{S}(\alpha, m, \theta_1, \theta_2, \dots, \theta_{K-1}, D) = r$  then*

$$m - f^{(r+1)}(D) > \theta_r - \frac{2}{n\alpha} \ln \frac{1}{\delta} - \frac{4}{n\alpha} \ln \frac{r(r+1)}{\delta}.$$

*Proof.* Using the tail bound for the Laplace distribution,

$$\Pr \left( G < -\frac{2}{\alpha} \ln \frac{1}{\delta} \right) \leq \frac{\delta}{2}$$

and

$$\Pr \left( Z_r < -\frac{4}{\alpha} \ln \frac{r(r+1)}{\delta} \right) \leq \frac{\delta}{2r(r+1)}$$

for each  $r \in \{1, 2, \dots, K-1\}$ . Therefore, by a union bound, with probability at least  $1 - \delta$ ,

$$G \geq -\frac{2}{\alpha} \ln \frac{1}{\delta} \quad \text{and} \quad Z_r \geq -\frac{4}{\alpha} \ln \frac{r(r+1)}{\delta} \quad \forall r \in \{1, 2, \dots, K-1\}.$$

The claim follows.  $\square$

### A.1.3 Restricted Exponential Mechanism

The third part of Algorithm 1 uses the exponential mechanism on the top  $\ell$  items to select one of these items; it is detailed in Algorithm 4.

**Lemma 5.** *Assume  $D$  satisfies the  $(\ell, \gamma)$ -margin condition with*

$$\gamma \geq \frac{2}{n} \left( 1 + \frac{\ln(\ell/\beta)}{\alpha} \right).$$

*Then for any neighbor  $D' \in \mathcal{X}^n$  of  $D$ , and any  $S \subseteq \mathcal{U}$ ,*

$$\Pr(A(\alpha, D) \in S) \leq \exp(\alpha) \cdot \Pr(A(\alpha, D') \in S) + \beta.$$

*Proof.* For any  $r \in \{1, 2, \dots, K\}$  and dataset  $\tilde{D} \in \mathcal{X}^n$ , let  $H_{\tilde{D}} \subseteq \mathcal{U}$  denote the  $r$  items of highest  $f(\cdot, \tilde{D})$  value (ties broken arbitrarily). (In Algorithm 4, we have  $\mathcal{U}_\ell = H_D$ .) It suffices to show that

$$\Pr(A(\alpha, \ell, D') = i) \leq \max \{ \Pr(A(\alpha, \ell, D) = i) \exp(\alpha), \beta/\ell \}, \quad \forall i \in H_{D'}.$$

This is because  $\Pr(A(\alpha, \ell, D') \notin H_{D'}) = 0$  and  $|H_{D'}| = \ell$ .

Fix any  $i \in H_{D'}$ . Because  $f(j, \cdot)$  is  $(1/n)$ -Lipschitz for every  $j \in \mathcal{U}$ , so is  $f^{(r)}(\cdot)$  for every  $r \in [K]$ . Therefore

$$\sum_{r=1}^{\ell} \exp\left(\frac{n\alpha}{2} f^{(r)}(D')\right) \geq \sum_{r=1}^{\ell} \exp\left(\frac{n\alpha}{2} f^{(r)}(D)\right) \exp(-\alpha/2).$$

Also by the  $(1/n)$ -Lipschitz property,

$$\exp\left(\frac{n\alpha}{2} f(i, D')\right) \leq \exp\left(\frac{n\alpha}{2} f(i, D)\right) \exp(\alpha/2).$$

Therefore, combining the two displayed equations above gives

$$\Pr(A(\alpha, \ell, D') = i) = \frac{\exp\left(\frac{n\alpha}{2} f(i, D')\right)}{\sum_{r=1}^{\ell} \exp\left(\frac{n\alpha}{2} f^{(r)}(D')\right)} \leq \frac{\exp\left(\frac{n\alpha}{2} f(i, D)\right)}{\sum_{r=1}^{\ell} \exp\left(\frac{n\alpha}{2} f^{(r)}(D)\right)} \exp(\alpha). \quad (7)$$

If  $i \in H_D$ , then (7) reads

$$\Pr(A(\alpha, \ell, D') = i) \leq \Pr(A(\alpha, \ell, D) = i) \exp(\alpha).$$

If  $i \notin H_D$ , then the assumption that  $D$  satisfies the  $(\ell, \gamma)$ -margin condition implies

$$f(i, D) \leq f^{(1)}(D) - \gamma;$$

so combining the above inequality with (7), as well as the assumption  $\gamma \geq (2/n)(1 + \ln(\ell/\beta)/\alpha)$ , gives

$$\Pr(A(\alpha, \ell, D') = i) \leq \frac{\exp\left(\frac{n\alpha}{2} (f^{(1)}(D) - \gamma)\right)}{\exp\left(\frac{n\alpha}{2} f^{(1)}(D)\right)} \exp(\alpha) \leq \beta/\ell. \quad \square$$

#### A.1.4 Privacy of Algorithm 1

For clarity, we suppress the privacy parameter inputs to the algorithms. By standard composition results for differential privacy [17], Lemma 1, and Lemma 3, the release of  $M(D)$  and  $S(M(D), D)$  is  $(2\alpha/3)$ -differentially private. Define the shorthand  $MS(D) := (M(D), S(M(D), D))$ , and let  $\mu_D$  denote the corresponding probability measure over the range of  $MS(D)$ .

For a dataset  $D \in \mathcal{X}^n$ , let  $\mathcal{V}_D$  be set of  $(\tilde{m}, \tilde{\ell})$  pairs (i.e., possible outputs of MS) such that

$$\tilde{m} \leq f^{(1)}(D) + \frac{3}{n\alpha} \ln \frac{3}{2\delta} \quad \text{and} \quad \tilde{m} - f^{(\tilde{\ell}+1)}(D) > T^{(\tilde{\ell})} - \frac{12}{n\alpha} \ln \frac{3\tilde{\ell}(\tilde{\ell}+1)}{\delta} - \frac{6}{n\alpha} \ln \frac{3}{\delta}.$$

If  $(m, \ell) \in \mathcal{V}_D$ , then the values of  $T^{(\ell)}$  and  $t^{(\ell)}$  certify that  $D$  satisfies the  $(\ell, t^{(\ell)})$ -margin condition. Lemma 2 and Lemma 4 imply that

$$\mu_D(\mathcal{V}_D) \geq 1 - \frac{2\delta}{3}.$$

Also, observe that if  $\beta := \delta \exp(-2\alpha/3)/3$ , then

$$t^{(\ell)} = \frac{2}{n} \left( 1 + \frac{\ln(\ell/\beta)}{\alpha/3} \right).$$

Therefore, for any neighbor  $D' \in \mathcal{X}^n$  of  $D$ , and any  $S \subseteq \mathcal{U}$ ,

$$\begin{aligned} \Pr(\text{LMM}(D) \in S) &= \int \Pr(A(\ell, D) \in S \mid MS(D) = (m, \ell)) d\mu_D \\ &\leq \int_{\mathcal{V}_D} \Pr(A(\ell, D) \in S \mid MS(D) = (m, \ell)) d\mu_D + \frac{2\delta}{3} \\ &\leq \int_{\mathcal{V}_D} \left( e^{\alpha/3} \Pr(A(\ell, D') \in S \mid MS(D) = (m, \ell)) + \beta \right) e^{2\alpha/3} d\mu_{D'} + \frac{2\delta}{3} \\ &= \int_{\mathcal{V}_D} \left( e^{\alpha/3} \Pr(A(\ell, D') \in S \mid MS(D') = (m, \ell)) + \frac{\delta e^{-2\alpha/3}}{3} \right) e^{2\alpha/3} d\mu_{D'} + \frac{2\delta}{3} \\ &\leq \int \left( e^{\alpha/3} \Pr(A(\ell, D') \in S \mid MS(D') = (m, \ell)) + \frac{\delta e^{-2\alpha/3}}{3} \right) e^{2\alpha/3} d\mu_{D'} + \frac{2\delta}{3} \\ &= e^{\alpha} \Pr(\text{LMM}(D') \in S) + \delta. \end{aligned}$$

Above, the second inequality follows from Lemma 5 and the  $(2\alpha/3)$ -differential privacy of MS.  $\square$

## A.2 Utility Analysis

*Proof of Theorem 3.* Using tail bounds for the Laplace distribution, it follows that with probability at least  $1 - \eta/2$ ,

$$Z \geq -\frac{3}{\alpha} \ln \frac{3}{\eta}, \quad G \leq \frac{6}{\alpha} \ln \frac{3}{\eta}, \quad Z_{\ell^*} \leq \frac{12}{\alpha} \ln \frac{3}{\eta}.$$

In this event, the assumption that  $D$  satisfies the  $(\ell^*, \gamma^*)$ -margin condition implies that

$$\left(f^{(1)}(D) + Z/n\right) - f^{(\ell^*+1)}(D) > (Z_{\ell^*} + G)/n + T^{(\ell^*)},$$

so the while-loop terminates with  $\ell \leq \ell^*$ . Also, the probability distribution  $\mathbf{p}$  in Step 14 of Algorithm 1 assigns probability mass at most  $\eta/2$  to the set of items  $i$  with

$$f(i, D) \leq f^{(1)}(D) - \frac{6 \ln(2\ell/\eta)}{n\alpha}.$$

Therefore, by a union bound, the item  $I$  returned by Algorithm 1 satisfies

$$f(I, D) > f^{(1)}(D) - \frac{6 \ln(2\ell^*/\eta)}{n\alpha}$$

with probability at least  $1 - \eta$ .  $\square$

## A.3 Proofs of Lower Bounds

*Proof of Theorem 1.* We construct the private maximization problem as follows. Let the domain  $\mathcal{X} := 2^{\mathcal{U}}$  (subsets of items), and define  $f : \mathcal{U} \times \mathcal{X}^n \rightarrow \mathbb{R}$  by

$$f(i, D) := \frac{1}{n} \sum_{s=1}^n \mathbb{1}\{i \in D_s\}.$$

In other words, the function  $f(i, \cdot)$  is the fraction of entries containing  $i$ . It is easy to see that  $f(i, \cdot)$  is  $(1/n)$ -Lipschitz for all  $i \in \mathcal{U}$ .

Let  $m := \min\{n/2, \log((\ell-1)/2)/\alpha\}$ . We define a collection of  $\ell$  datasets  $D^1, D^2, \dots, D^\ell \in \mathcal{X}^n$  with the following properties:

1. For each  $i$ , the first  $n/2$  entries of  $D^i$  are equal to  $[\ell] := \{1, 2, \dots, \ell\}$ , the next  $n/2 - m$  entries of  $D^i$  are equal to  $\emptyset$ , and the last  $m$  entries of  $D^i$  are equal to  $\{i\}$ . Therefore

$$f(j, D^i) = \begin{cases} 0 & \text{if } j \notin [\ell], \\ \frac{1}{2} & \text{if } j \in [\ell] \setminus \{i\}, \\ \frac{1}{2} + \frac{m}{n} & \text{if } j = i, \end{cases}$$

so  $f(i, D^i) = f^{(1)}(D^i)$  and  $D^i$  satisfies the  $(\ell, m/n)$ -margin condition.

2. For each  $i \neq j$ , the datasets  $D^i$  and  $D^j$  differ only in (the last)  $m$  entries.

Let  $\mathcal{A}$  be  $(\alpha, \delta)$ -approximate differentially private. Assume for sake of contradiction that

$$\Pr\left(f(\mathcal{A}(D^i), D^i) > f^{(1)}(D^i) - \frac{m}{n}\right) \geq \frac{1}{2}$$

for all  $i \in [\ell]$ . Since only  $i$  satisfies  $f(i, D^i) > f^{(1)}(D^i) - m/n$ , this is the same as  $\Pr(\mathcal{A}(D^i) = i) \geq 1/2$  for all  $i \in [\ell]$ . This then implies the following chain of inequalities leading to a contradiction:

$$\begin{aligned} \frac{1}{2} &> \Pr(\mathcal{A}(D^i) \neq i) \\ &\geq \sum_{j \in [\ell] \setminus \{i\}} \Pr(\mathcal{A}(D^i) = j) \\ &\geq \sum_{j \in [\ell] \setminus \{i\}} e^{-\alpha m} \Pr(\mathcal{A}(D^j) = j) - \frac{\delta}{1 - e^{-\alpha}} \\ &\geq (\ell - 1) \left( \frac{e^{-\alpha m}}{2} - \frac{\delta}{1 - e^{-\alpha}} \right) \geq \frac{1}{2}. \end{aligned}$$

The first inequality above is by assumption; the third inequality follows from Lemma 6; the fourth inequality again uses the assumption; and the final inequality follows by the definition of  $m$  and the condition on  $\delta$ . Since a contradiction is reached, there must exist some  $i \in [\ell]$  such that  $\Pr(f(\mathcal{A}(D^i), D^i) > f^{(1)}(D^i) - m/n) < 1/2$ .  $\square$

**Lemma 6** ([11]). *Let  $D$  and  $D'$  be any two datasets that differ in at most  $k$  entries, and let  $\mathcal{A}$  be any  $(\alpha, \delta)$ -approximate differentially private algorithm with range  $\mathcal{S}$ . Then, for any  $S \subseteq \mathcal{S}$ ,*

$$\Pr(\mathcal{A}(D) \in S) \geq e^{-k\alpha} \Pr(\mathcal{A}(D') \in S) - \frac{\delta}{1 - e^{-\alpha}}.$$
